# Supplementary material
Source: HighWire-hosted journal article supplement (https://bmjopen.bmj.com/content/12/10/e060606)
Supplement: inline-supplementary-material-5 [file inline-supplementary-material-5.pdf]

**Table** – Characteristics of studies excluded following full text assessment

| <b>Study / Authors</b>     | <b>Year</b> | <b>Country</b>                                | <b>Study Design</b>           | <b>Study Objectives</b>                                                                                                                                                  | <b>Reasons for Exclusion</b>                                                                                 |
|----------------------------|-------------|-----------------------------------------------|-------------------------------|--------------------------------------------------------------------------------------------------------------------------------------------------------------------------|--------------------------------------------------------------------------------------------------------------|
| <i>Akintomide et al[5]</i> | 2021        | Austria, Finland, Germany, Poland, Sweden, UK | Prospective cohort            | Secondary analysis of continuation, unwanted effects and cost consequences at 1 year in IUD users ≤30 in the European Active Surveillance Study for Intrauterine Devices | Undifferentiable results - IUD type categories based on IUD characteristics rather than brand or name of IUD |
| <i>Garbers et al[20]</i>   | 2013        | USA                                           | Retrospective records review  | Prevalence and predictors of IUD discontinuation at 6 months in 306 Cu T380A users                                                                                       | Undifferentiable results; varied duration; 23 excluded from continuation analysis                            |
| <i>Goldstuck[21]</i>       | 1980        | UK                                            | Prospective cohort (selected) | Clinical evaluation of the combined multiload copper 250-mini IUD in selected nulliparous women                                                                          | Undifferentiable results; disparity between data in tables and text                                          |
| <i>Hindle[27]</i>          | 1978        | Unable to confirm                             |                               | Clinical evaluation and follow-up on 3,829 IUD procedures                                                                                                                | Full text unobtainable                                                                                       |
| <i>Lete et al[22]</i>      | 1998        | Spain                                         | Prospective cross-sectional   | Evaluation of IUD use in nulliparous women compared to parous women over a 12-year period                                                                                | Data reported as incidence of events rather than rates                                                       |
| <i>Ogedengbe et al[23]</i> | 1991        | Nigeria                                       | Prospective cohort            | A comparison efficacy and discontinuation at 1 year of multiload and copper-T IUDs sequentially assigned to users                                                        | Parity of participants not detailed (mean parity 4); only one nulliparous participant                        |
| <i>Patnaik[28]</i>         | 2003        | India                                         | Unable to confirm             | Uptake, satisfaction, retention and reasons for discontinuation of the copper T IUD                                                                                      | Full text unobtainable                                                                                       |
| <i>Petersen et al[29]</i>  | 1991        | Unable to confirm                             | RCT – double blind            | Significance of endometrial cavity length in the clinical performance of IUDs in nulligravidae                                                                           | Full text unobtainable                                                                                       |
| <i>Phillips et al[24]</i>  | 2017        | USA                                           | Retrospective records review  | Comparison of continuation and performance of levonorgestrel and copper intrauterine devices over 5 years                                                                | Undifferentiable results                                                                                     |
| <i>Sivin and Tatum[25]</i> | 1981        | USA                                           | Prospective cohort            | Clinical performance of the TCu 380A IUD over 4 years                                                                                                                    | Undifferentiable results                                                                                     |
| <i>Teal et al[26]</i>      | 2015        | USA                                           | Retrospective records review  | Evaluation of the success and safety of intrauterine device (IUD) placement in adolescents based on age and parity                                                       | Undifferentiable results                                                                                     |
|                            |             |                                               |                               |                                                                                                                                                                          |                                                                                                              |

## References

5. Akintomide H, Brima N, Mansour DJ, et al, Copper IUD continuation, unwanted effects and cost consequences at 1 year in users aged under 30 – a secondary analysis of the EURAS-IUD study. *The European Journal of Contraception & Reproductive Health Care*, 2021. 26(3): p. 175-183.
20. Garbers S, Haines-Stephan J, Lipton Y, et al, Continuation of copper-containing intrauterine devices at 6 months. *Contraception*, 2013. 87(1): p. 101-106.
21. Goldstuck ND, Clinical evaluation of the combined multiload copper 250-mini IUD in selected nulliparous women. *Contraceptive delivery systems*, 1980. 1(4): p. 379-387.

27. Hindle WH, Clinical evaluation and follow-up on 3,829 IUD procedures. *Transactions of the Pacific Coast Obstetrical and Gynecological Society*, 1978. 45: p. 105-110.
22. Lete I, Morales P and De Pablo JL, Use of intrauterine contraceptive devices in nulliparous women: personal experience over a 12-year period. *The European Journal of Contraception & Reproductive Health Care*, 1998. 3(4): p. 190-193.
23. Ogedengbe OK, Giwa-Osagie OF and Oye-Adeniran BA, A comparison of multiload with Copper-T IUDs in a family planning clinic in Lagos. *British Journal of Family Planning*, 1991. 17(3): p. 67-69.
28. Patnaik BP and Mishra KP, User satisfaction and retention of Cu-T (IUD) amongst rural women in Orissa. *Health and Population: Perspectives and Issues*, 2003. 26(2): p. 52-58.
29. Petersen KR, Brooks L Fau - Jacobsen N, Jacobsen N Fau - Skoby SO, et al, Clinical performance of intrauterine devices in nulligravidae: is the length of the endometrial cavity of significance? *Acta Eur Fertil*, 1991. 22(4): p. 225-8.
24. Phillips SJ, Hofler LG, Modest AM, et al, Continuation of copper and levonorgestrel intrauterine devices: a retrospective cohort study. *American journal of obstetrics and gynecology*, 2017. 217(1): p. 57.e1-57.e6.
25. Sivin I and Tatum HJ, Four years of experience with the TCU 380A intrauterine contraceptive device. *Fertility and sterility*, 1981. 36(2): p. 159-163.
26. Teal SB, Romer SE, Goldthwaite LM, et al. Insertion characteristics of intrauterine devices in adolescents and young women: success, ancillary measures, and complications. *Am J Obstet Gynecol* 2015;213(4):515.e1-5. doi: 10.1016/j.ajog.2015.06.
