# Supplementary material
Source: HighWire-hosted journal article supplement (https://bmjopen.bmj.com/content/12/10/e060606)
Supplement: inline-supplementary-material-6 [file inline-supplementary-material-6.pdf]

**Table** – Quality Assessment of Included Studies Using the Mixed Methods Appraisal Tool (MMAT) version 2018

| Study / Authors                   | Design Category              | Responses to MMAT Questions (and Scores): Yes (1) / No (0) / Can't Tell (0) |             |             |             |             |             |             |       |
|-----------------------------------|------------------------------|-----------------------------------------------------------------------------|-------------|-------------|-------------|-------------|-------------|-------------|-------|
|                                   |                              | Screening 1                                                                 | Screening 2 | Appraisal 1 | Appraisal 2 | Appraisal 3 | Appraisal 4 | Appraisal 5 | Total |
| <i>Abraham et al 2015</i>         | Quantitative, non-randomised | yes                                                                         | yes         | yes         | yes         | yes         | yes         | yes         | 7     |
| <i>Akintomide et al 2019</i>      | Quantitative, non-randomised | yes                                                                         | yes         | yes         | yes         | no          | yes         | yes         | 6     |
| <i>Allonen et al 1980</i>         | Quantitative, randomised     | yes                                                                         | yes         | can't tell  | yes         | yes         | yes         | yes         | 6     |
| <i>Elkhateeb et al 2020</i>       | Quantitative, non-randomised | yes                                                                         | yes         | yes         | yes         | yes         | yes         | yes         | 7     |
| <i>Fugere 1990</i>                | Quantitative, non-randomised | yes                                                                         | yes         | yes         | yes         | yes         | yes         | yes         | 7     |
| <i>Hall and Kutler 2015</i>       | Quantitative, non-randomised | yes                                                                         | yes         | yes         | yes         | yes         | yes         | yes         | 7     |
| <i>Kaislasuo et al 2015</i>       | Quantitative, non-randomised | yes                                                                         | yes         | yes         | yes         | yes         | yes         | yes         | 7     |
| <i>Larsen et al 1981</i>          | Quantitative, randomised     | yes                                                                         | yes         | can't tell  | yes         | yes         | no          | yes         | 5     |
| <i>Lewit 1973</i>                 | Quantitative, non-randomised | yes                                                                         | yes         | yes         | yes         | yes         | yes         | yes         | 7     |
| <i>Liedholm and Sjoberg 1974</i>  | Quantitative, non-randomised | yes                                                                         | yes         | yes         | yes         | yes         | yes         | yes         | 7     |
| <i>Luukkainen et al 1979</i>      | Quantitative, randomised     | yes                                                                         | yes         | can't tell  | yes         | yes         | yes         | yes         | 6     |
| <i>Luukkainen et al 1987</i>      | Quantitative, randomised     | yes                                                                         | yes         | yes         | yes         | yes         | no          | yes         | 6     |
| <i>Mishell et al 1973</i>         | Quantitative, non-randomised | yes                                                                         | yes         | yes         | yes         | yes         | yes         | yes         | 7     |
| <i>Nygren et al 1981</i>          | Quantitative, randomised     | yes                                                                         | yes         | yes         | yes         | yes         | yes         | yes         | 7     |
| <i>Ostergard and Gunning 1979</i> | Quantitative, randomised     | yes                                                                         | yes         | yes         | can't tell  | yes         | no          | yes         | 5     |
| <i>Otero-Flores et al 2003</i>    | Quantitative, randomised     | yes                                                                         | yes         | yes         | yes         | yes         | no          | yes         | 6     |
| <i>Roy et al 1974</i>             | Quantitative, non-randomised | yes                                                                         | yes         | yes         | yes         | yes         | yes         | yes         | 7     |
| <i>Sivin and Stern 1979</i>       | Quantitative, randomised     | yes                                                                         | yes         | can't tell  | can't tell  | yes         | yes         | yes         | 5     |
| <i>Timonen et al 1974</i>         | Quantitative, non-randomised | yes                                                                         | yes         | yes         | yes         | yes         | yes         | yes         | 7     |
|                                   |                              |                                                                             |             |             |             |             |             |             |       |
