# Supplementary material
Source: HighWire-hosted journal article supplement (https://bmjopen.bmj.com/content/12/10/e060606)
Supplement: inline-supplementary-material-7 [file inline-supplementary-material-7.pdf]

### Tau<sup>2</sup> Values for Heterogeneity of Included Studies

| IUD type                                            | Tau <sup>2</sup> Values for Heterogeneity of Included Studies for Continuation Rates    |                              |                                   |
|-----------------------------------------------------|-----------------------------------------------------------------------------------------|------------------------------|-----------------------------------|
|                                                     | Nulliparous women aged <30                                                              | Nulliparous women of any age | Overall effect size (all studies) |
| <i>TCu 380A excluding Otero- Flores data</i>        | 0.0 <sup>a</sup> [19, 34]                                                               | 0.005 [19, 30, 45]           | 0.0 [19, 30, 34, 45]              |
| <i>TCu 380A including Otero- Flores data</i>        | 0.487 [19, 34, 44]                                                                      | 0.005 [19, 30, 44, 45]       | 0.299 [19, 30, 34, 44, 45]        |
| <i>Smaller TCu 380A<sup>b</sup></i>                 | not applicable – only one study group                                                   | 0.0 [30, 44]                 | 0.0 [30, 44]                      |
| <i>TCu 300</i>                                      | not applicable – no study                                                               | 0.0 [45, 47]                 | 0.0 [45, 47]                      |
| <i>TCu 200</i>                                      | 0.010 [37]                                                                              | 0.012 [37-39, 41, 43, 45]    | 0.012 [37-39, 41, 43, 45]         |
| <i>Nova T200</i>                                    | not applicable – no study                                                               | 0.0 [39, 40]                 | 0.0 [39, 40]                      |
|                                                     | Tau <sup>2</sup> Values for Heterogeneity of Included Studies for Discontinuation Rates |                              |                                   |
| <i>TCu 200 discontinuation due to bleeding/pain</i> | 0.001 [37]                                                                              | 0.036 [36-39, 41, 43, 45]    | 0.025 [36-39, 41, 43, 45]         |
| <i>TCu 200 discontinuation due to expulsion</i>     | 0.010 [37]                                                                              | 0.018 [36-39, 41, 43, 45]    | 0.018 [36-39, 41, 43, 45]         |
| <i>TCu 200 discontinuation due to pregnancy</i>     | 0.002 [37]                                                                              | 0.005 [36-39, 41, 43, 45]    | 0.004 [36-39, 41, 43, 45]         |

a – includes women aged 30 from Hall and Kutler study data; b – TCu 380A Nul/Mini TT380 Slimline IUDs
