# Supplementary material
Source: HighWire-hosted journal article supplement (https://bmjopen.bmj.com/content/12/10/e060606)
Supplement: inline-supplementary-material-8 [file inline-supplementary-material-8.pdf]

## Supplementary material – Doi plots

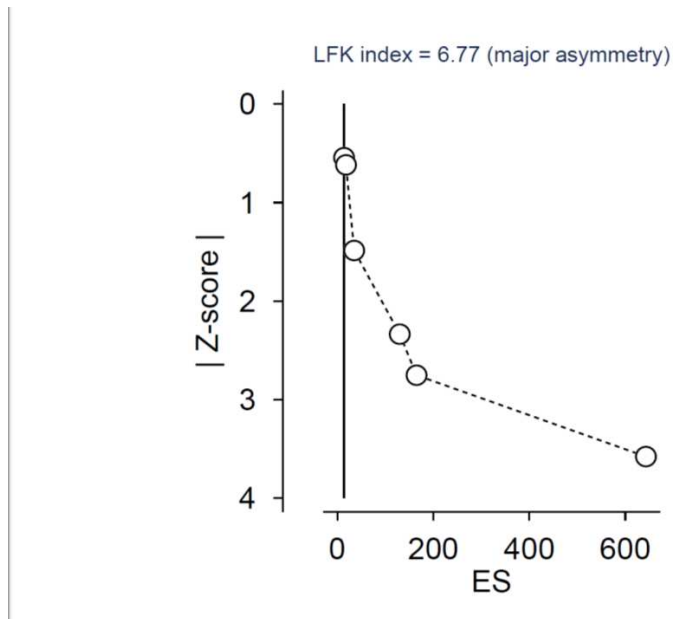

Figure 1 - Doi plot for TCU 380A continuation at 12 months

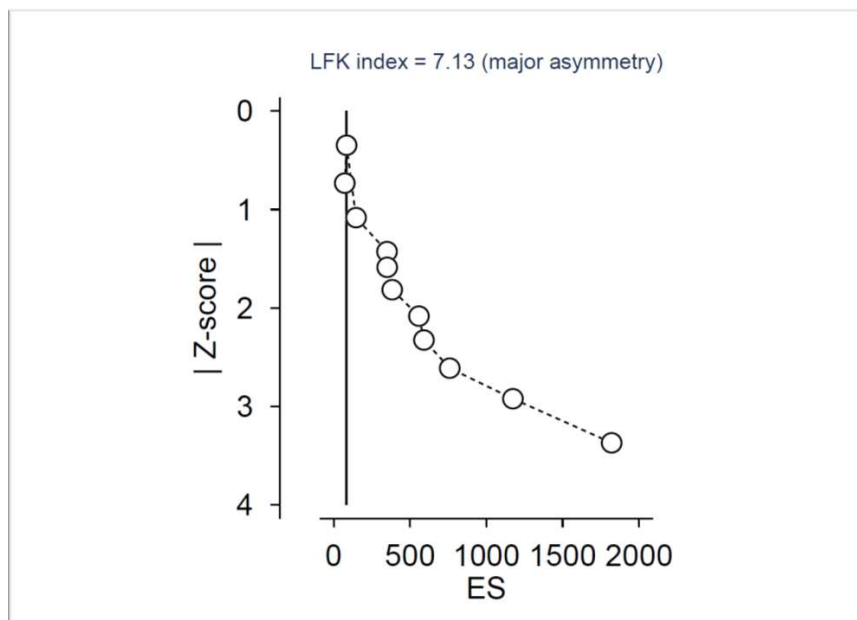

Figure 2 – Doi plot for TCU 200 continuation at 12 months

## Supplementary material – Doi plots

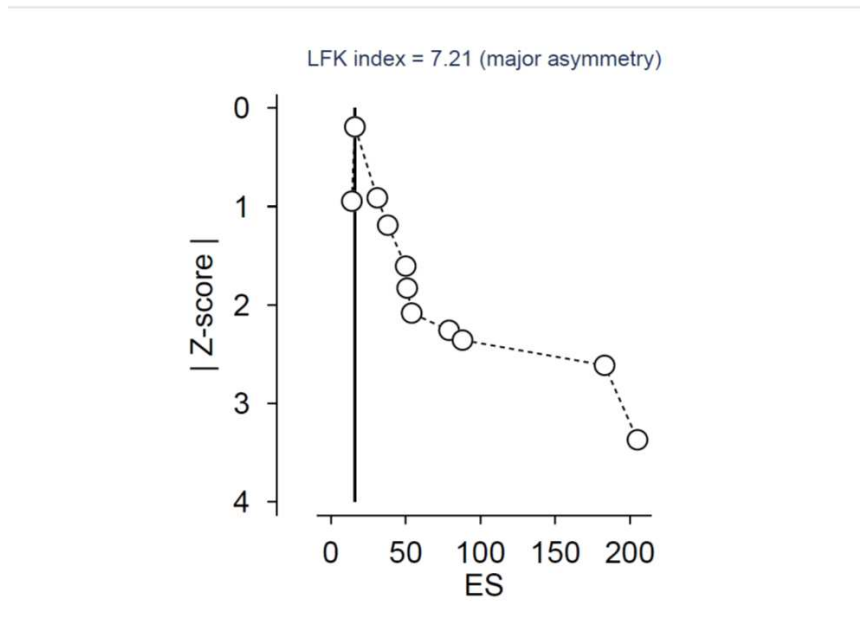

Figure 3 – Doi plot for TCu 200 discontinuation at 12 months due to bleeding/pain

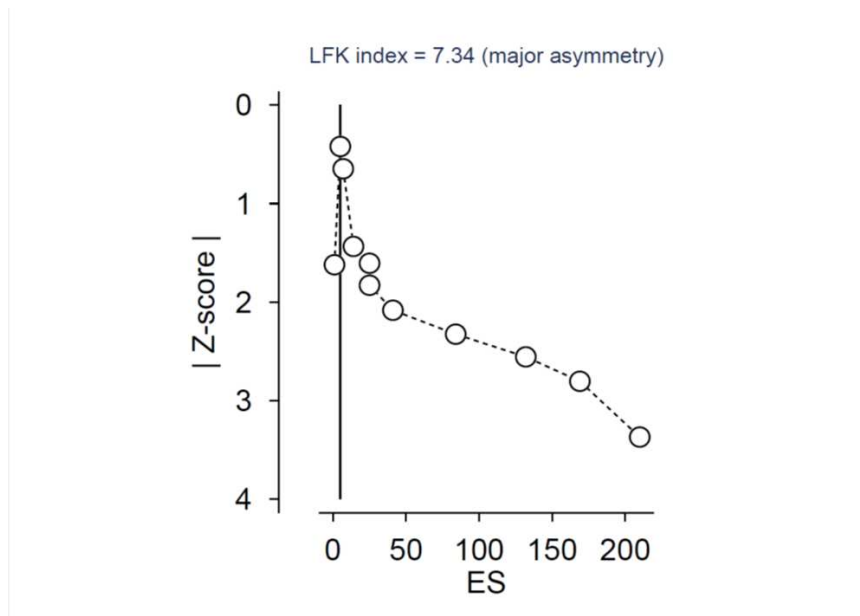

Figure 4 – Doi plot for TCu 200 discontinuation at 12 months due to expulsion

## Supplementary material – Doi plots

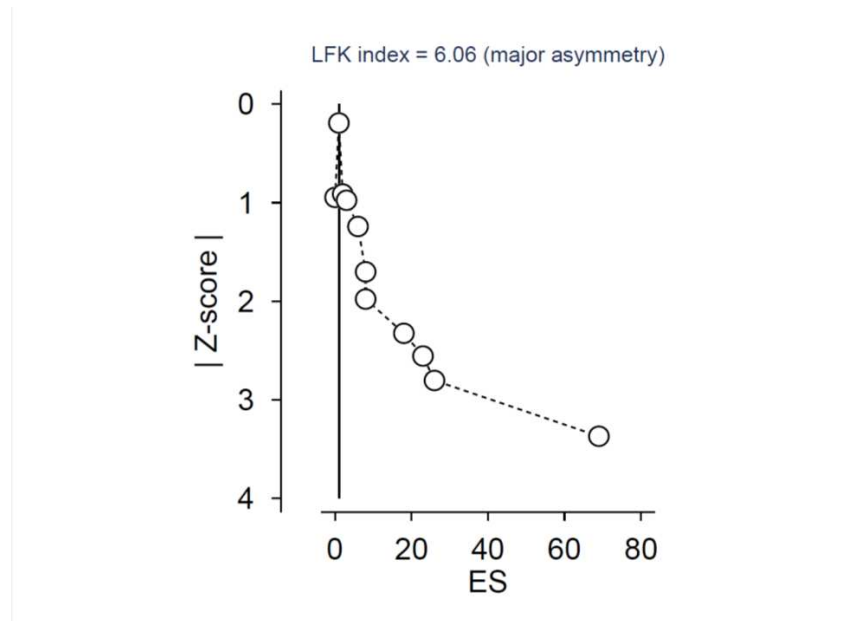

Figure 5 – Doi plot for TCu 200 discontinuation due to pregnancy
